# Supplementary material for: Discovery of the Key Mutation Site Influencing the Thermostability of Thermomyces lanuginosus Lipase by Rosetta Design Programs
Source: MDPI journal article supplement (doi:10.3390/ijms23168963), 2022-08-11
Supplement: s1 [file s1]

**Table S1 Stable substitutions of charged residues predicted by Rosetta programs.**

| Charged Residues | Rosetta Cartesian_ddG<br>( $\Delta\Delta G<0$ ) |        | Rosstta ddg_monomer<br>( $\Delta\Delta G<0$ ) |        | Overlapped substitutions |
|------------------|-------------------------------------------------|--------|-----------------------------------------------|--------|--------------------------|
| D111             | D111A                                           | -1.056 | D111A                                         | -2.802 | D111A                    |
|                  | D111K                                           | -0.165 | D111K                                         | -4.101 | D111K                    |
|                  | D111L                                           | -0.582 | D111L                                         | -2.695 | D111L                    |
|                  | D111R                                           | -0.776 | D111R                                         | -1.955 | D111R                    |
|                  | D111V                                           | -0.209 | D111V                                         | -1.264 | D111V                    |
|                  | D111W                                           | -0.352 | D111W                                         | -1.653 | D111W                    |
|                  | D111Y                                           | -0.342 | D111Y                                         | -2.14  | D111Y                    |
|                  |                                                 |        | D111M                                         | -2.355 |                          |
|                  |                                                 |        | D111N                                         | -0.804 |                          |
|                  |                                                 |        | D111H                                         | -1.323 |                          |
|                  |                                                 |        | D111F                                         | -2.102 |                          |
|                  |                                                 |        | D111I                                         | -2.309 |                          |
|                  |                                                 |        | D111S                                         | -1.449 |                          |
|                  |                                                 |        | D111T                                         | -0.333 |                          |
|                  |                                                 |        | D111E                                         | -1.974 |                          |
| D158             | D158M                                           | -1.688 | D158M                                         | -2.259 | D158M                    |
|                  | D158Q                                           | -0.245 | D158Q                                         | -1.438 | D158Q                    |
|                  | D158V                                           | -0.801 | D158V                                         | -1.659 | D158V                    |
|                  | D158F                                           | -1.383 | D158F                                         | -3.955 | D158F                    |
|                  | D158L                                           | -0.362 | D158L                                         | -2.296 | D158L                    |
|                  | D158E                                           | -0.254 | D158N                                         | -0.776 |                          |
|                  |                                                 |        | D158A                                         | -1.327 |                          |
|                  |                                                 |        | D158H                                         | -3.365 |                          |
|                  |                                                 |        | D158R                                         | -0.557 |                          |
|                  |                                                 |        | D158S                                         | -2.126 |                          |
|                  |                                                 |        | D158T                                         | -0.297 |                          |
|                  |                                                 |        | D158W                                         | -3.29  |                          |
|                  |                                                 |        | D158Y                                         | -3.145 |                          |
| D165             | D165Q                                           | -0.313 | D165Q                                         | -0.903 | D165Q                    |
|                  | D165E                                           | -1.306 | D165A                                         | -1.674 |                          |
|                  |                                                 |        | D165F                                         | -0.613 |                          |
|                  |                                                 |        | D165H                                         | -0.298 |                          |
|                  |                                                 |        | D165I                                         | -0.785 |                          |

|      |       |        |       |        |       |
|------|-------|--------|-------|--------|-------|
|      |       |        | D165M | -0.398 |       |
|      |       |        | D165N | -0.291 |       |
|      |       |        | D165P | -0.766 |       |
|      |       |        | D165R | -0.73  |       |
|      |       |        | D165T | -0.46  |       |
|      |       |        | D165V | -0.741 |       |
|      |       |        | D165W | -0.635 |       |
| R209 | R209A | -0.501 | R209A | -0.821 | R209A |
|      | R209E | -0.15  | R209E | -0.503 | R209E |
|      | R209H | -0.205 | R209H | -1.646 | R209H |
|      | R209I | -0.188 | R209I | -1.194 | R209I |
|      | R209K | -0.01  | R209K | -0.72  | R209K |
|      | R209M | -0.197 | R209M | -0.901 | R209M |
|      | R209P | -3.149 | R209P | -2.275 | R209P |
|      | R209Q | -1.959 | R209Q | -0.307 | R209Q |
|      | R209T | -1.229 | R209T | -1.496 | R209T |
|      | R209V | -0.694 | R209V | -1.147 | R209V |
|      | R209C | -0.221 | R209W | -0.244 |       |
|      | R209L | -1.536 | R209Y | -0.487 |       |
|      | R209S | -0.931 | R209D | -0.048 |       |
|      |       |        | R209N | -1.135 |       |
| R232 | R232A | -1.16  | R232A | -0.757 | R232A |
|      | R232F | -0.508 | R232F | -2.756 | R232F |
|      | R232H | -0.214 | R232H | -2.175 | R232H |
|      | R232P | -2.249 | R232P | -1.797 | R232P |
|      | R232Q | -0.303 | R232Q | -1.452 | R232Q |
|      | R232V | -1.463 | R232V | -0.886 | R232V |
|      | R232W | -0.253 | R232W | -4.209 | R232W |
|      | R232Y | -0.847 | R232Y | -2.171 | R232Y |
|      | R232K | -1.836 | R232E | -0.347 |       |
|      | R232I | -0.493 | R232N | -0.34  |       |
|      |       |        | R232S | -1.021 |       |
|      |       |        | R232T | -0.586 |       |
| E239 | E239L | -0.618 | E239L | -1.069 | E239L |
|      | E239T | -0.721 | E239T | -0.793 | E239T |
|      | E239V | -0.426 | E239V | -0.045 | E239V |

|      |       |        |       |        |       |
|------|-------|--------|-------|--------|-------|
|      | E239D | -1.351 | E239F | -1.746 |       |
|      |       |        | E239A | -0.099 |       |
|      |       |        | E239I | -0.138 |       |
|      |       |        | E239K | -0.07  |       |
|      |       |        | E239M | -1.108 |       |
|      |       |        | E239Q | -1.241 |       |
|      |       |        | E239R | -0.009 |       |
|      |       |        | E239W | -0.654 |       |
|      |       |        | E239Y | -1.666 |       |
| D254 | D254F | -0.426 | D254F | -3.824 | D254F |
|      | D254Y | -0.357 | D254Y | -4.248 | D254Y |
|      |       |        | D254C | -0.348 |       |
|      |       |        | D254G | -1.421 |       |
|      |       |        | D254H | -3.679 |       |
|      |       |        | D254A | -2.563 |       |
|      |       |        | D254K | -3.463 |       |
|      |       |        | D254L | -2.434 |       |
|      |       |        | D254M | -1.67  |       |
|      |       |        | D254N | -1.55  |       |
|      |       |        | D254Q | -0.747 |       |
|      |       |        | D254T | -1.249 |       |
|      |       |        | D254V | -3.707 |       |
|      |       |        | D254W | -3.189 |       |

**Table S2. Oligonucleotide primers for *TLL* and genes of the ten R209 mutants.**

| <b>Primers</b> | <b>Primer sequences</b>                                |
|----------------|--------------------------------------------------------|
| TLL-forward    | 5'-GAGGTCTCGCAGGATCTGTTTAACCAG-3'                      |
| TLL-reverse    | 5'- AAGACATGTTCCAATTAAACCGAAGTA-3'                     |
| R209A-forward  | 5'-CCTAGACTCCCTCCA <b><u>G</u></b> CCGAGTTCGGTTA-3'    |
| R209A-reverse  | 5'- <b><u>G</u></b> CTGGAGGGAGTCTAGGGACAATATCATTGGT-3' |
| R209E-forward  | 5'-CCTAGACTCCCTCCA <b><u>GA</u></b> GAGTTCGGTTAC-3'    |
| R209E-reverse  | 5'- <b><u>TT</u></b> CTGGAGGGAGTCTAGGGACAATATCATT-3'   |
| R209H-forward  | 5'-CCTAGACTCCCTCCA <b><u>A</u></b> CACGAGTTCGGTTA-3'   |
| R209H-reverse  | 5'- <b><u>GT</u></b> TGGAGGGAGTCTAGGGACAATATCATT-3'    |
| R209K-forward  | 5'-CCTAGACTCCCTCCA <b><u>AAG</u></b> GAGTTCGGTTAC-3'   |
| R209K-reverse  | 5'- <b><u>CTT</u></b> TGGAGGGAGTCTAGGGACAATATCATT-3'   |
| R209M-forward  | 5'-CCTAGACTCCCTCCA <b><u>ATG</u></b> GAGTTCGGTTACA-3'  |
| R209M-reverse  | 5'- <b><u>CAT</u></b> TGGAGGGAGTCTAGGGACAATATCATT-3'   |
| R209P-forward  | 5'-CCTAGACTCCCTCCAC <b><u>C</u></b> CGAGTTCGGT-3'      |
| R209P-reverse  | 5'- <b><u>G</u></b> GTGGAGGGAGTCTAGGGACAATATCA-3'      |
| R209T-forward  | 5'-CCTAGACTCCCTCCA <b><u>AC</u></b> GAGTTCGGTTA-3'     |
| R209T-reverse  | 5'- <b><u>GT</u></b> TGGAGGGAGTCTAGGGACAATATCATTGGT-3' |
| R209I-forward  | 5'-CCTAGACTCCCTCCA <b><u>AT</u></b> CGAGTTCGGTTA-3'    |
| R209I-reverse  | 5'- <b><u>ATT</u></b> GAGGGAGTCTAGGGACAATATCATTGGT-3'  |
| R209Q-forward  | 5'-CCTAGACTCCCTCCAC <b><u>AA</u></b> GAGTTCGGTTACA-3'  |
| R209Q-reverse  | 5'- <b><u>TT</u></b> GTGGAGGGAGTCTAGGGACAATATCATT-3'   |
| R209V-forward  | 5'-CCTAGACTCCCTCCA <b><u>G</u></b> TCGAGTTCGGTTA-3'    |
| R209V-reverse  | 5'- <b><u>AC</u></b> TGGAGGGAGTCTAGGGACAATATCATTGGT-3' |

**Nucleotide resulting in the desired mutation is underlined and in bold**
